# Supplementary material for: Response of Functional Traits of Aquatic Plants to Water Depth Changes under Short-Term Eutrophic Clear-Water Conditions: A Mesocosm Study
Source: MDPI journal article supplement (doi:10.3390/plants13101310), 2024-05-09
Supplement: s1 [file s1]

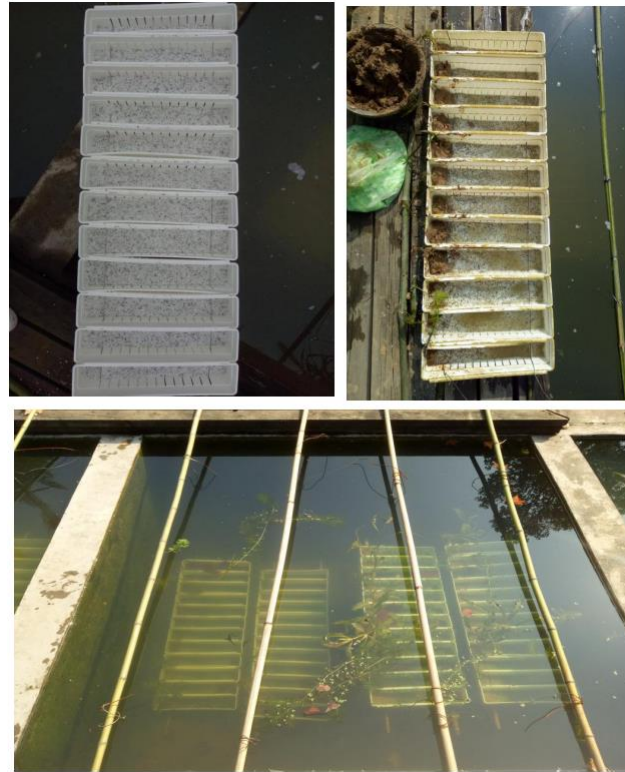

**Figure S1.** Illustration of experimental preparation and tanks.

**Table S1.** Life forms and rhizome presence/absence of the collected 20 species. “Y” and “N” mean with or without rhizomes. “E\_” refers to emergent and “S\_” to “submerged”.

| Family           | Species                                            | Abbreviation | Life form          | Rhizome |
|------------------|----------------------------------------------------|--------------|--------------------|---------|
| Cabombaceae      | <i>Cabomba caroliniana</i>                         | S_Cc         | Submerged          | N       |
| Araliaceae       | <i>Hydrocotyle vulgaris</i>                        | E_Hy         | Emergent           | Y       |
| Ruellioideae     | <i>Hygrophila salicifolia</i>                      | S_Hs         | Submerged          | N       |
| Hydrocharitaceae | <i>Hydrilla verticillata</i>                       | S_Hv         | Submerged          | N       |
| Scrophulariaceae | <i>Limnophila indica</i>                           | S_Li/E_Li    | Submerged/Emergent | Y       |
| Scrophulariaceae | <i>Limnophila sessiliflora</i>                     | E_Ls         | Submerged          | Y       |
| Onagraceae       | <i>Ludwigia ovalis</i>                             | E_Lo         | Submerged          | N       |
| Onagraceae       | <i>Ludwigia peploides</i> subsp. <i>stipulacea</i> | E_Lp         | Submerged          | N       |
| Haloragidaceae   | <i>Myriophyllum aquaticum</i>                      | S_Ma/E_Ma    | Submerged/Emergent | N       |
| Haloragidaceae   | <i>Myriophyllum propinquum</i>                     | S_Mp         | Emergent           | N       |

|                  |                                   |           |                    |   |
|------------------|-----------------------------------|-----------|--------------------|---|
| Haloragidaceae   | <i>Myriophyllum spicatum</i>      | S_Ms      | Submerged          | N |
| Haloragidaceae   | <i>Myriophyllum verticillatum</i> | S_Mv      | Submerged          | N |
| Hydrocharitaceae | <i>Najas guadalupensis</i>        | S_Ng      | Submerged          | Y |
| Hydrocharitaceae | <i>Vallisneria denseserrulata</i> | S_Vd      | Submerged          | Y |
| Potamogetonaceae | <i>Potamogeton lucens</i>         | S_Pl      | Submerged          | Y |
| Potamogetonaceae | <i>Potamogeton maackianus</i>     | S_Pm      | Submerged          | Y |
| Potamogetonaceae | <i>Potamogeton octandrus</i>      | S_Po      | Submerged          | Y |
| Potamogetonaceae | <i>Potamogeton perfoliatus</i>    | S_Pp      | Submerged          | Y |
| Potamogetonaceae | <i>Potamogeton wrightii</i>       | S_Pw/E_Pw | Submerged/Emergent | Y |
| Lythraceae       | <i>Rotala rotundifolia</i>        | S_Rr/E_Rr | Submerged/Emergent | N |

**Table S2.** Statistical summary of the differences in periphyton Chla and AFDW between the two depths using Mann Whitney U test (n=3-5). Detailed species names are listed in Table S1. “/” means no results.

| Species | Periphyton Chla |                | AFDW |                |
|---------|-----------------|----------------|------|----------------|
|         | W               | <i>p</i> Value | W    | <i>p</i> Value |
| E_Hy    | 4               | 0.77           | 2    | 0.77           |
| E_Li    | 0               | 0.22           | 0    | 0.22           |
| E_Lo    | 0               | 0.25           | 0    | 0.22           |
| E_Lp    | 2               | 0.77           | 0    | 0.15           |
| E_Ma    | 3               | 0.66           | 0    | 0.15           |
| E_Mp    | 0               | 0.11           | /    | /              |
| E_Pw    | 9               | 0.08           | 1    | 0.19           |
| S_Cc    | 4               | 0.77           | 6    | 0.15           |
| S_Hs    | 6               | 0.11           | /    | /              |
| S_Hv    | 9               | 0.38           | 6    | 0.66           |
| S_Li    | 5               | 0.86           | 6    | 0.49           |
| S_Ma    | 9               | 0.06           | 6    | 0.11           |
| S_Ng    | 7               | 0.89           | 5    | 0.47           |
| S_Pl    | 9               | 0.90           | 4    | 0.18           |
| S_Pm    | 0               | 0.08           | 0    | 0.14           |
| S_Pp    | 0               | 0.06           | 0    | 0.06           |
| S_Pw    | 3               | 0.82           | 1    | 0.25           |
| S_Rr    | 4               | 1.00           | 0    | 0.22           |
| S_Vd    | 2               | 1.00           | 2    | 1.00           |

**Table S3.** Statistical summary of the differences in ramet number and rhizome length between the two depths using Mann Whitney U test (n=3-5). Species names are listed in Table S1.

| Species | Ramet number |                | Rhizome length |                |
|---------|--------------|----------------|----------------|----------------|
|         | W            | <i>p</i> Value | W              | <i>p</i> Value |
| S_Vd    | 4.5          | 0.22           | 3              | 1.00           |
| S_Pw    | 5.5          | 0.47           | 5.5            | 0.48           |
| S_Pm    | 3            | 0.32           | 3              | 0.44           |
| S_Pl    | 7.5          | 0.88           | 12             | 0.25           |
| E_Pw    | 5.5          | 0.65           | 4              | 0.83           |
| E_Hy    | 3            | 0.32           | 2              | 1.00           |

**Table S4.** Correlation analysis between periphyton biomass and macrophyte biomass. 'E' refers to emergent macrophytes and 'S' to submerged macrophytes. Two depths (50 cm and 100 cm) are indicated by 50 and 100.

| Biomass         | E_50                      | S_50                       | E_100      | S_100                      |
|-----------------|---------------------------|----------------------------|------------|----------------------------|
| Periphyton Chla | $p < 0.05$ , $R^2 = 0.37$ | $p < 0.01$ , $R^2 = 0.26$  | $p > 0.05$ | $p = 0.01$ , $R^2 = 0.16$  |
| Periphyton AFDW | $p < 0.01$ , $R^2 = 0.64$ | $p < 0.001$ , $R^2 = 0.47$ | $p > 0.05$ | $p < 0.001$ , $R^2 = 0.63$ |

The biomass of emergent macrophyte species and periphyton biomass did not correlate significantly at 100 cm depth, whereas plant biomass was negatively correlated with periphyton Chla and AFDW at 50 cm. For submerged macrophytes, periphyton Chla and AFDW were negatively correlated with periphyton biomass independently of water depth (Table S4).
